# Supplementary material for: Photo-Fenton-induced selective dehydrogenative coupling of methanol into ethylene glycol over iron species-anchored TiO2 nanorods
Source: Royal Society of Chemistry journal article supplement (doi:10.1039/d2cy02025d), 2023-01-01
Supplement: d2cy02025d1.pdf [file d2cy02025d1.pdf]

## Supporting Information

### Photo-Fenton-induced selectively dehydrogenative coupling of methanol into ethylene glycol over iron species anchored TiO<sub>2</sub> nanorods

Wenjun Yan,<sup>a,c</sup> Na Li,<sup>\*b</sup> Zhiyu Yan<sup>d</sup> and Zhongde Wang<sup>\*a</sup>

<sup>a</sup>Department of Chemical Engineering, Taiyuan University of Technology, Taiyuan 030024, China.

<sup>b</sup>College of Chemical and Biological Engineering, Taiyuan University of Science and Technology, Taiyuan 030024, China.

<sup>c</sup>State Key Laboratory of Coal Conversion, Institute of Coal Chemistry, Chinese Academy of Sciences, Taiyuan 030001, China.

<sup>d</sup>Department of Electrical and Computer Engineering, Texas A&M University, 188 Bizzell St., College Station, Texas 77843-3128, USA.

\*Corresponding author E-mail: 2022051@tyust.edu.cn (N. Li), wangzhongde@tyut.edu.cn (Z.D. Wang)

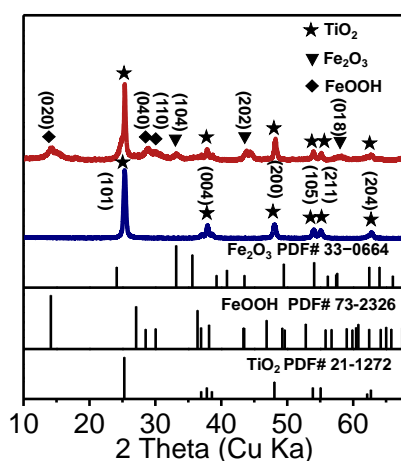

**Fig. S1** XRD pattern of pristine TiO<sub>2</sub> nanorods and TiO<sub>2</sub>/FeO<sub>x</sub> nanorods

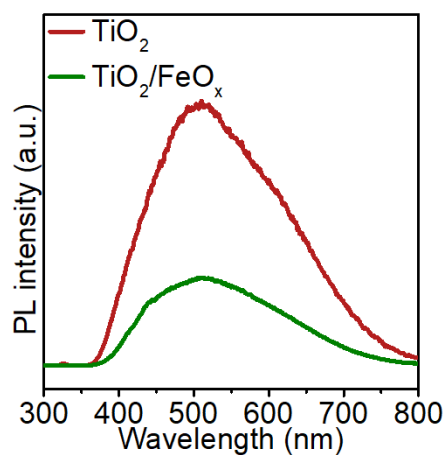

**Fig. S2** Photoluminescence spectra of TiO<sub>2</sub> nanorods and TiO<sub>2</sub>/FeO<sub>x</sub> nanorods

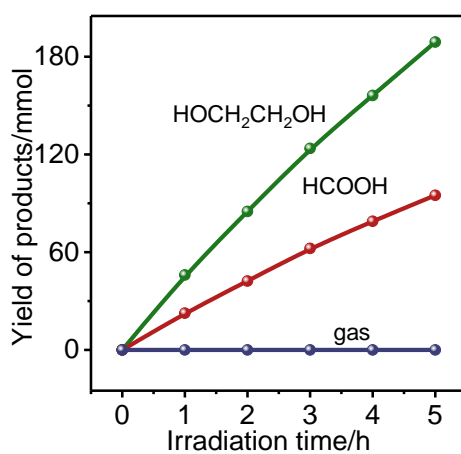

**Fig. S3** Yield of products for the photocatalytic conversion of methanol as a function of the reaction time (30 % aqueous H<sub>2</sub>O<sub>2</sub> fed at 5 mL/h)

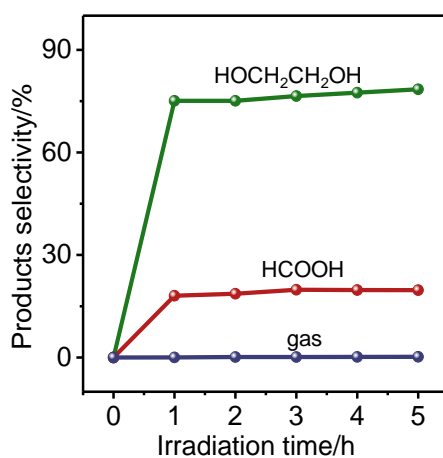

**Fig. S4** Selectivity of products for the photocatalytic conversion of methanol as a function of the reaction time (30 % aqueous H<sub>2</sub>O<sub>2</sub> fed at 5 mL/h)

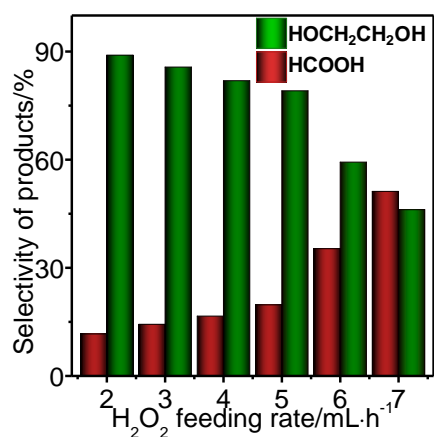

**Fig. S5** Effect of H<sub>2</sub>O<sub>2</sub> feeding rate on the selectivity of products

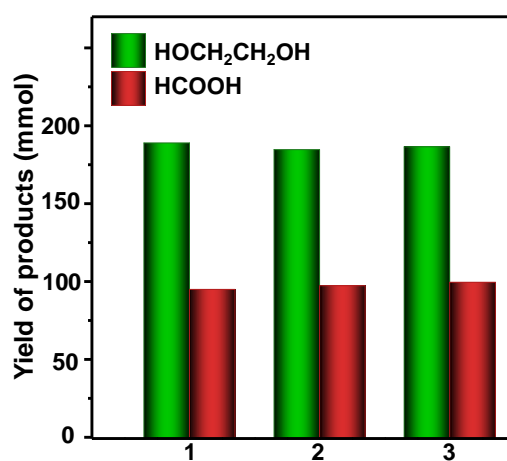

**Fig. S6** Recycling test of the photocatalytic conversion of methanol

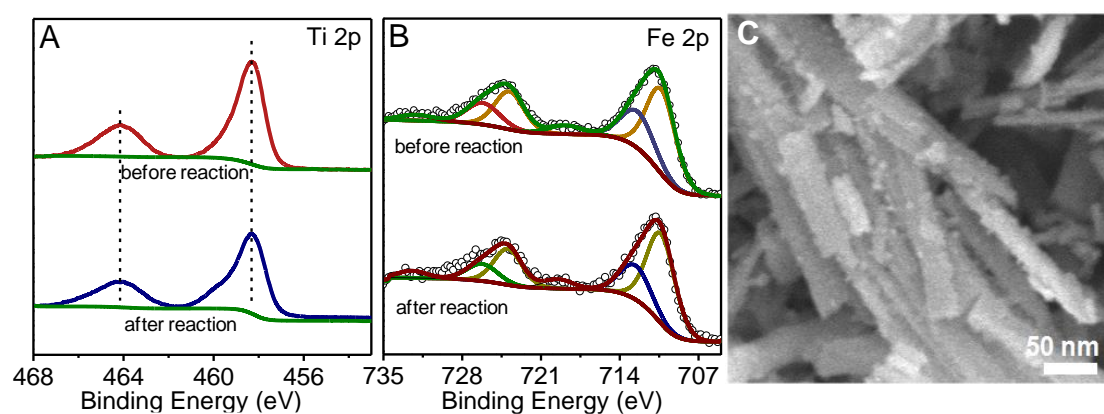

**Fig. S7** (A) Ti 2p narrow spectra, (B) Fe 2p XPS narrow spectra of TiO<sub>2</sub>/FeO<sub>x</sub> nanorods before and after cycling stability test and (C) SEM images of TiO<sub>2</sub>/FeO<sub>x</sub> nanorods after cycling stability test (**Fig. S6**).

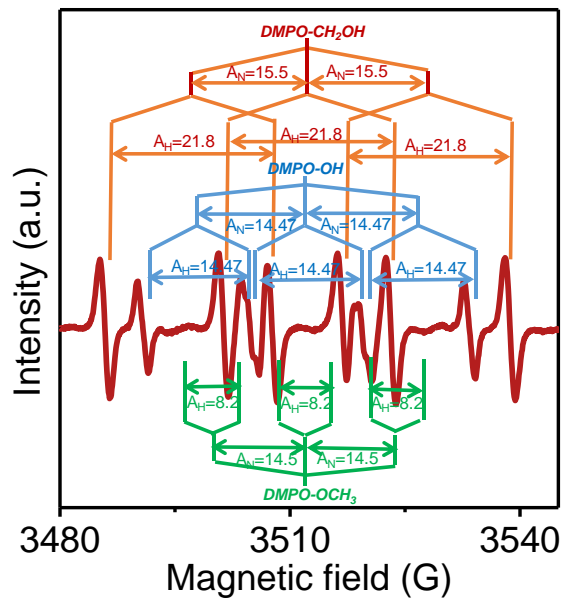

**Fig. S8** In situ EPR spectra of radical adducts trapped by DMPO in the methanol solution containing H<sub>2</sub>O<sub>2</sub> over TiO<sub>2</sub>/FeO<sub>x</sub> nanorods under UV irradiation

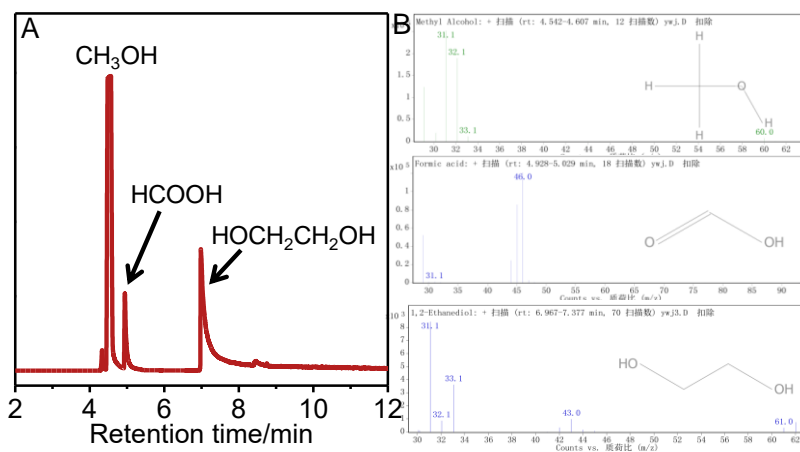

**Fig. S9** (A) Gas chromatogram and (B) Mass spectra of the products formed for the photocatalytic conversion of methanol

**Table S1** Experimental data for the photocatalytic C–C coupling of methanol

| catalyst                           | H <sub>2</sub> O <sub>2</sub><br>feeding<br>rate<br>mmol/h | amount<br>of OH<br>mmol | Formation rate<br>(mmol/h) |       |                   | Selectivity (%) |       |                   | H <sub>2</sub> O <sub>2</sub><br>utilization<br>efficiency | Methanol<br>Conversion<br>rate mmol/ h |
|------------------------------------|------------------------------------------------------------|-------------------------|----------------------------|-------|-------------------|-----------------|-------|-------------------|------------------------------------------------------------|----------------------------------------|
|                                    |                                                            |                         | EG                         | HCOOH | minor<br>products | EG              | HCOOH | minor<br>products |                                                            |                                        |
|                                    |                                                            |                         |                            |       |                   |                 |       |                   |                                                            |                                        |
| TiO <sub>2</sub> /FeO <sub>x</sub> | 5                                                          | 98.0                    | 37.8                       | 18.0  | 0.19              | 79.1            | 18.8  | 0.2               | 77.1                                                       | 95.5                                   |
| TiO <sub>2</sub> /FeO <sub>x</sub> | 6                                                          | 117.5                   | 32.1                       | 32.6  | 3.44              | 63.4            | 32.2  | 3.4               | 54.6                                                       | 101.1                                  |
